# Supplementary material for: Capsid-like biodegradable poly-glycolic acid nanoparticles for a long-time release of nucleic acid molecules
Source: Royal Society of Chemistry journal article supplement (doi:10.1039/d0ma00353k), 2020-11-13
Supplement: d0ma00353k1.pdf [file d0ma00353k1.pdf]

SUPPORTING INFORMATION

FOR

*Capsid-like biodegradable poly-glycolic acid nanoparticles for a long-time release of nucleic acid molecules*

*Clara Guido<sup>a,b&</sup>, Mariangela Testini<sup>b&</sup>, Stefania D'Amone<sup>b</sup>, Barbara Cortese<sup>c</sup>,  
Maria Grano<sup>d</sup>, , Giuseppe Gigli<sup>a,b</sup> and Ilaria E. Palamà<sup>b\*</sup>*

<sup>a</sup>*Dep. of Mathematics and Physics, University of Salento, via Monteroni, Lecce, Italy*

<sup>b</sup>*Nanotechnology Institute, CNR-NANOTEC, via Monteroni, Lecce, Italy.*

<sup>c</sup>*Nanotechnology Institute, CNR-NANOTEC, c/o La Sapienza University, Piazzale A. Moro,  
Roma, Italy.*

<sup>d</sup>*Dep. of Emergency and Organ Transplantation (DETO), School of Medicine, University of  
Bari, Bari, Italy*

*& contributed equally*

*\*corresponding author: [ilaria.palama@nanotec.cnr.it](mailto:ilaria.palama@nanotec.cnr.it)*

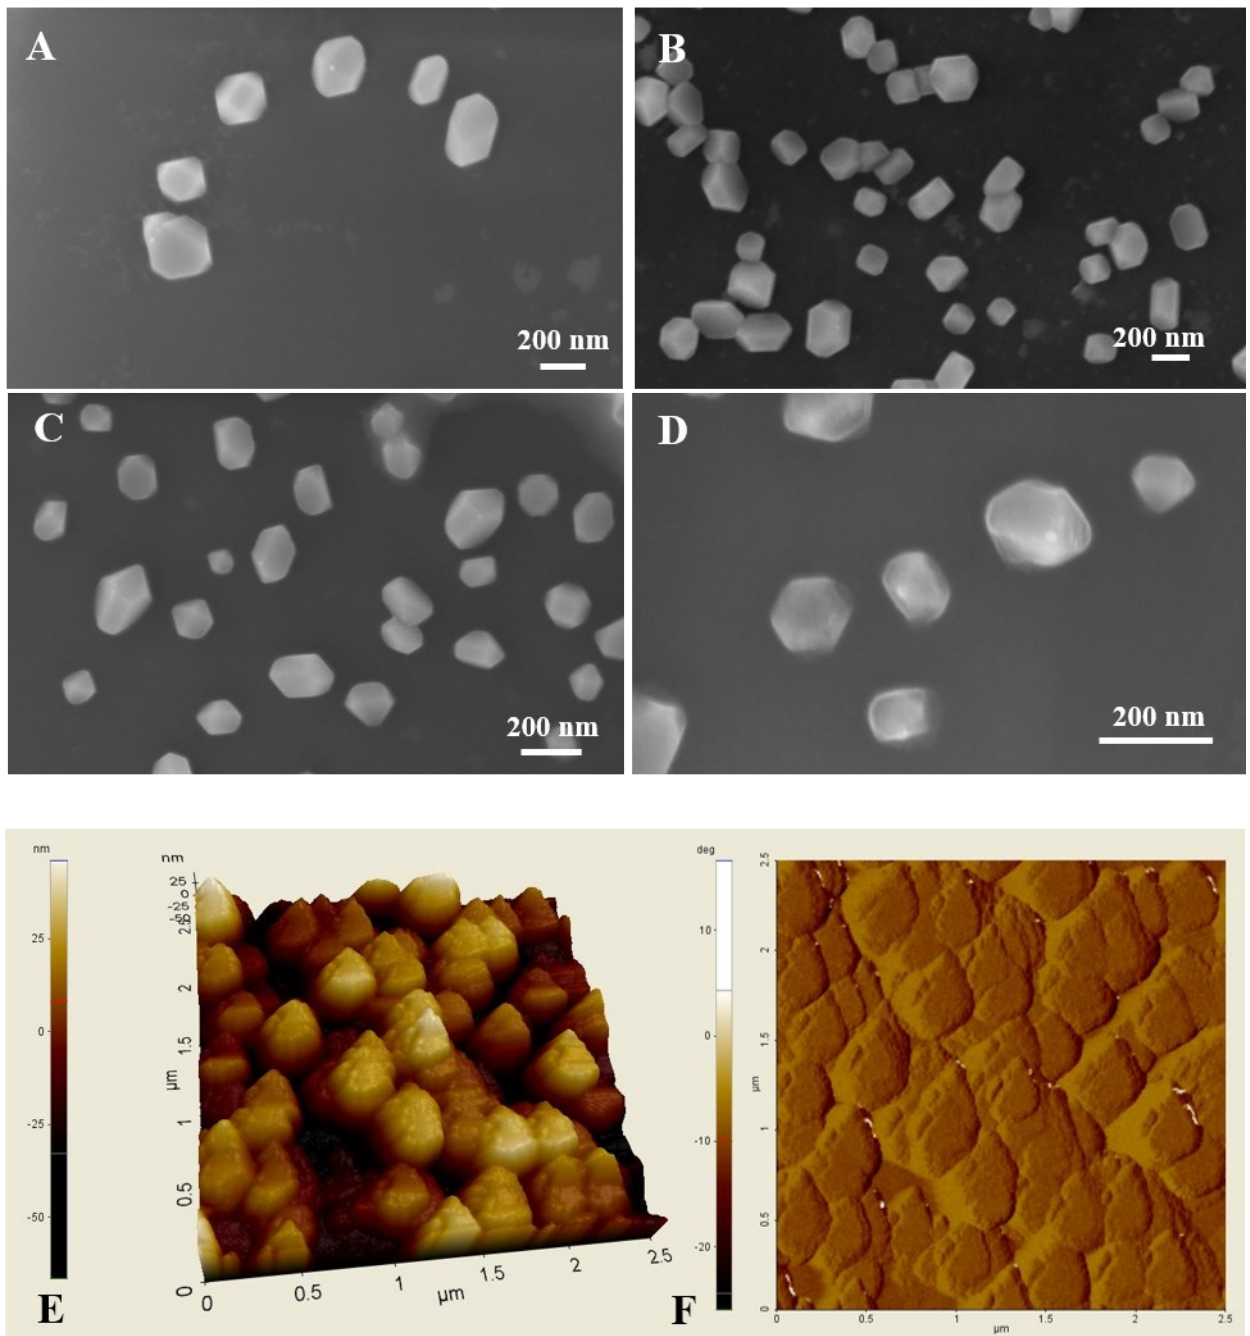

**Figure S1.** SEM images of empty PGA NPs (A), CH-DNA loaded PGA NPs (B), PEI-DNA loaded PGA NPs (C) and PRM-DNA loaded PGA NPs (scale bar: 200 nm). Representative 3D topographical (E) and phase (F) AFM images for PGA NPs (scale bar: 2.5  $\mu\text{m}$ ). Representative images of three independent experiments are shown.

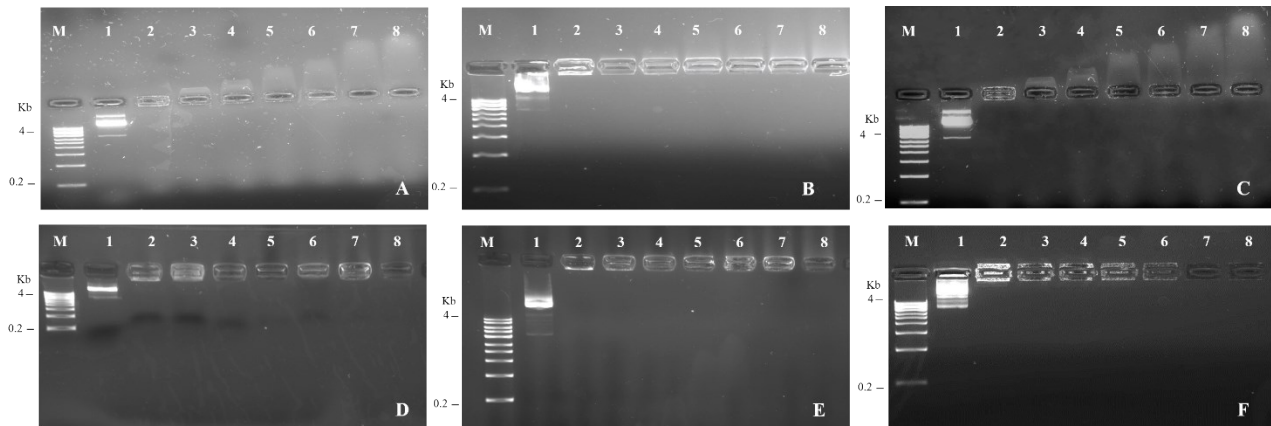

**Figure S2.** Agarose retardation assay of DNA complexed with polycation polymers (A,B,C) and DNA-loaded PGA NPs (D,E,F) with different DNA: polymer mass ratios. DNA refer to the pT7-EGFP plasmid. A) Lane M: DNA marker 1 Kb; Lane 1: naked DNA; Lane 2-8: CH-DNA complexes at a DNA: polymer mass ratio of 1:1, 1:3, 1:5, 1:10, 1:20, 1:50 and 1:100 respectively. E) Lane M: DNA marker 1 Kb; Lane 1: naked DNA; Lane 2-8: PEI-DNA complexes at mass ratio of 1:1, 1:3, 1:5, 1:10, 1:20, 1:50 and 1:100 respectively. F) Lane M: DNA marker 1 Kb; Lane 1: naked DNA; Lane 2-8: PRM-DNA complexes at mass ratio of 1:1, 1:3, 1:5, 1:10, 1:20, 1:50 and 1:100 respectively. D) Lane M: DNA marker 1 Kb; Lane 1: naked DNA; Lane 2-8: CH-DNA loaded PGA NPs at a DNA: polymer mass ratio of 1:1, 1:3, 1:5, 1:10, 1:20, 1:50 and 1:100 respectively. E) Lane M: DNA marker 1 Kb; Lane 1: naked DNA; Lane 2-8: PEI-DNA loaded PGA NPs at mass ratio of 1:1, 1:3, 1:5, 1:10, 1:20, 1:50 and 1:100 respectively. F) Lane M: DNA marker 1 Kb; Lane 1: naked DNA; Lane 2-8: PRM-DNA loaded PGA NPs at mass ratio of 1:1, 1:3, 1:5, 1:10, 1:20, 1:50 and 1:100 respectively. A representative of three independent experiments is shown.

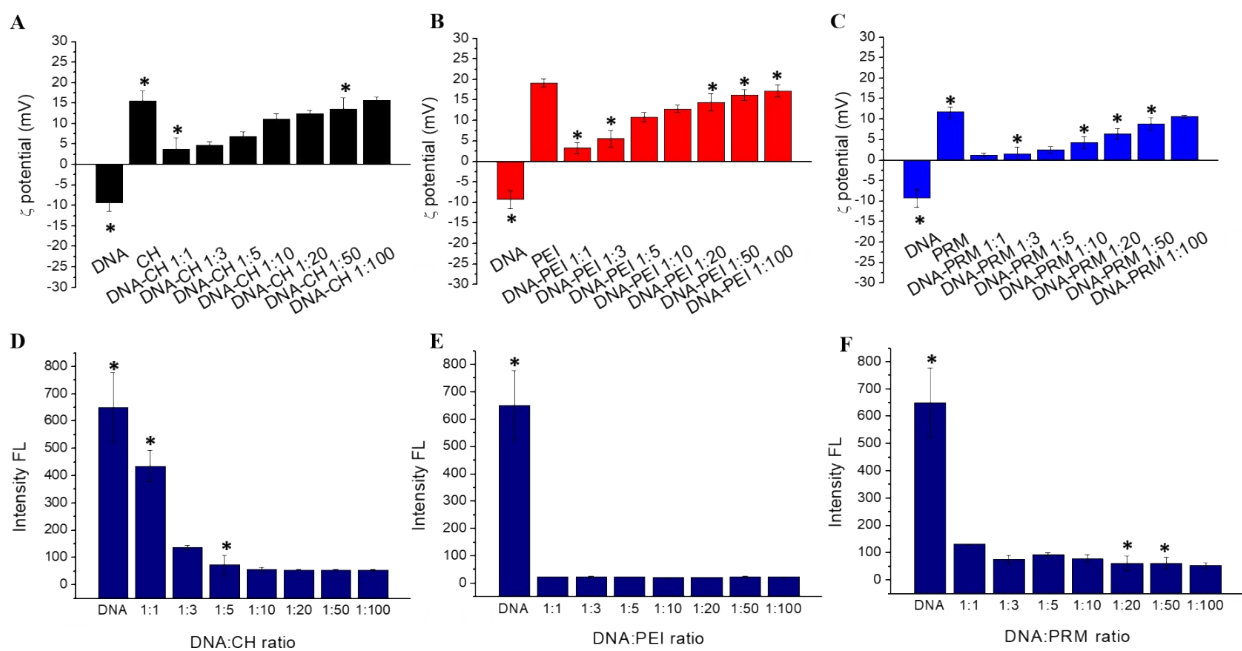

**Figure S3.** A, B, C) Zeta potential of naked DNA, CH, PEI and PRM, and of DNA-CH complexes (A), DNA-PEI complexes (B) and DNA-PRM complexes (C) with different mass ratio. SYBR safe displacement

assay of naked DNA and DNA-CH complexes (D), DNA-PEI complexes (E) and DNA-PRM complexes (F) with different mass ratio. DNA refers to pT7-EGFP plasmid. Means and sd of three distinct sets of data have been reported; \* indicates P-values of <0.05 for t-Student test.

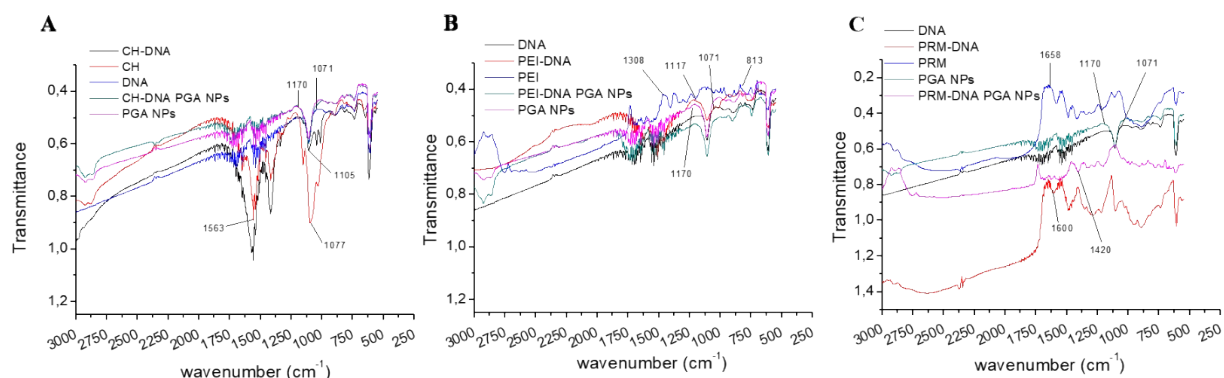

**Figure S4.** FT-IR analysis of CH-DNA loaded PGA NPs (A), PEI-DNA loaded PGA NPs (B) and PRM-DNA loaded PGA NPs (C).

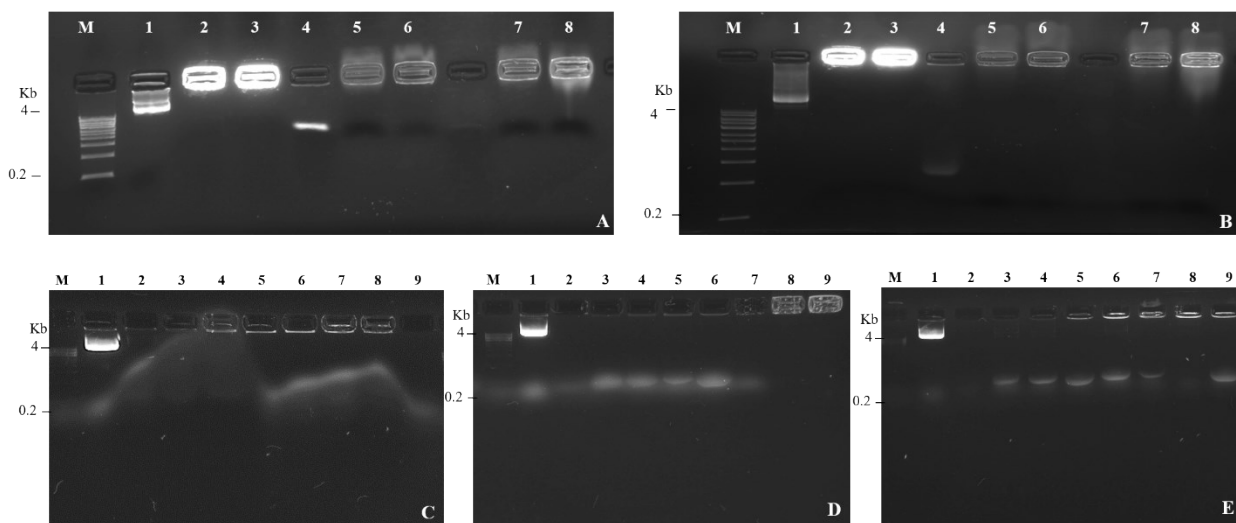

**Figure S5.** DNase protection assay of PGA NPs loaded with DNA complexed with CH, PEI and PRM after incubation with DNase I for 30 (A) and 60 minutes (B). Lane M: DNA marker 1 Kb; Lane 1: naked DNA; Lanes 2-3 for A and B, represent DNA-CH loaded PGA NPs at different ratio (1:50 and 1:100), after incubation with DNase I for 30 (A) and 60 minutes (B). Lane 4 for A and B represent naked DNA after incubation with DNase I for 30 (A) and 60 minutes (B). Lane 5-6 represent DNA-PEI loaded PGA NPs at different ratio (1:50 and 1:100), after incubation with DNase I for 60 (A) and 90 minutes (B). Lane 7-8 represent DNA-PRM loaded PGA NPs at different ratio (1:50 and 1:100), after incubation with DNase I for 30 (A) and 60 minutes (B).

DNase protection assay of PGA NPs loaded with DNA complexed with CH (C), PEI (D) and PRM (E) after incubation with DNase I for 90 minutes. Lane M: DNA marker 1 Kb; Lane 1: free DNA; Lane 2 for D and E, and lane 9 for C represent naked DNA after incubation with DNase I for 90 minutes. Lanes 2-8 for C and 3-9 for D and E represent, DNA-CH loaded PGA NPs, DNA-PEI loaded PGA NPs and DNA-PRM loaded PGA NPs at different ratio (1:1, 1:3, 1:5, 1:10, 1:20, 1:50, 1:100) respectively, after incubation with DNase I for 90 minutes. DNA refer to pT7-EGFP plasmid. Representative measurements of three independent experiments have been reported.

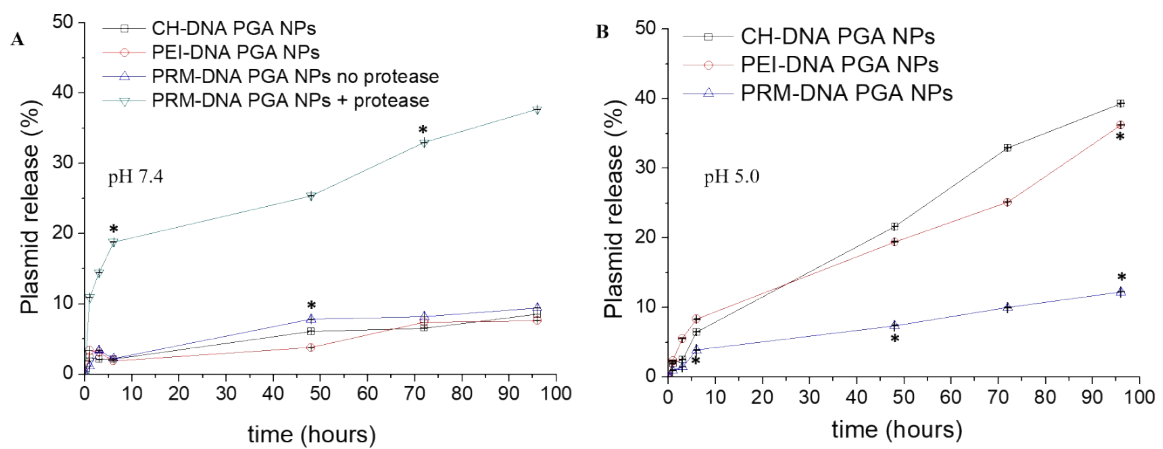

**Figure S6.** *In vitro* cumulative release (%) at 37°C and pH 7.4 (A) or pH 5.0 (B) of DNA from CH, PEI and PRM loaded PGA NPs over time. DNA refer to pT7-EGFP plasmid. Representative measurements of three distinct sets of data have been reported; \* indicates P-values of <0.05 for t-Student test.

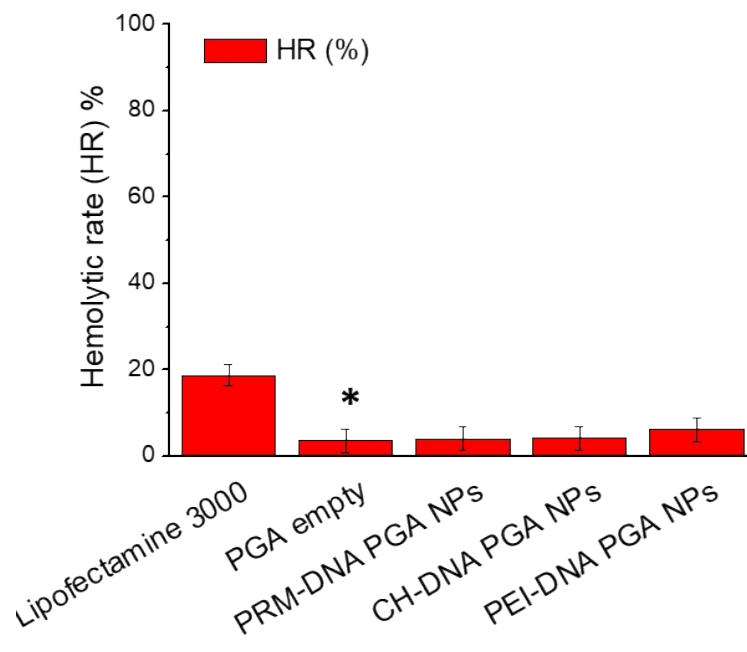

**Figure S7.** Hemolysis assay performing after 1 hours of incubation at 37°C with DNA-Lipofectamine 3000, empty PGA NPs and DNA-PRM, -CH and -PEI PGA NPs. DNA refer to pT7-EGFP plasmid. Mean  $\pm$  sd of three independent experiments are shown; \* indicates P-values of <0.05 for t-Student test.

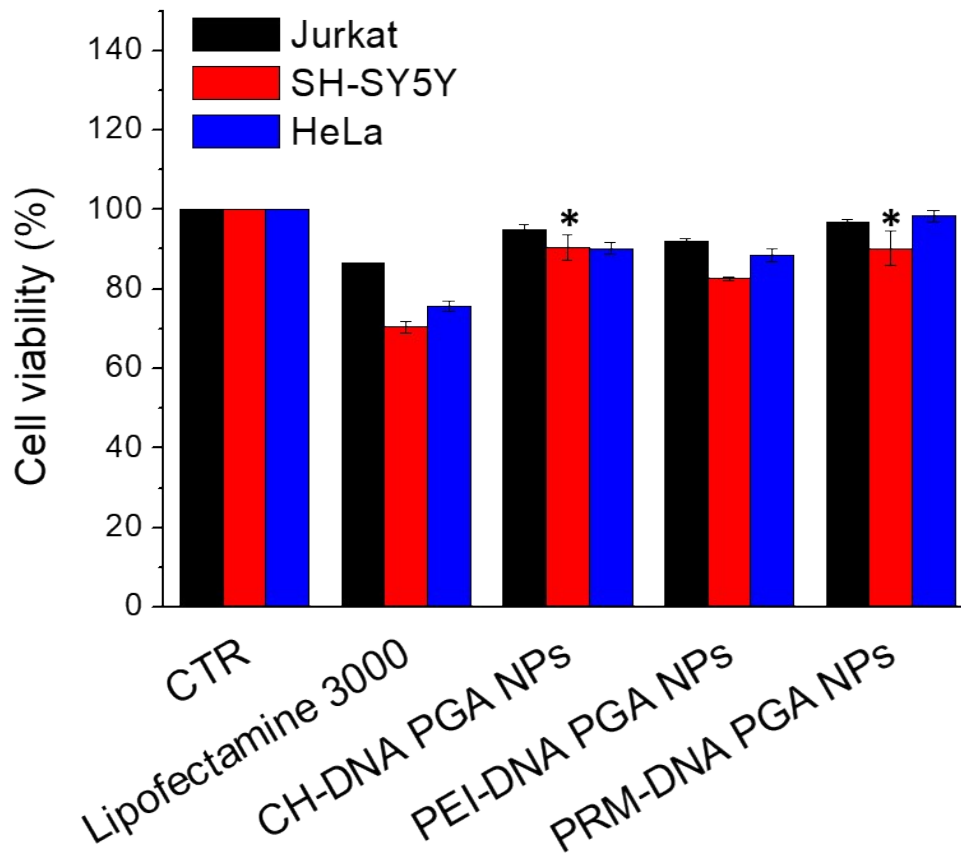

**Figure S8.** Cytotoxicity analysis of Jurkat, SH-SY5Y and HeLa cells incubated with DNA- lipofectamine 3000, DNA loaded CH-, PEI- and PRM- PGA NPs for 48 hours compared with untreated control cells (CTR). DNA refer to pT7-EGFP plasmid. Representative measurements of three independent experiments have been reported; \* indicates P-values of <0.05 for t-Student test.

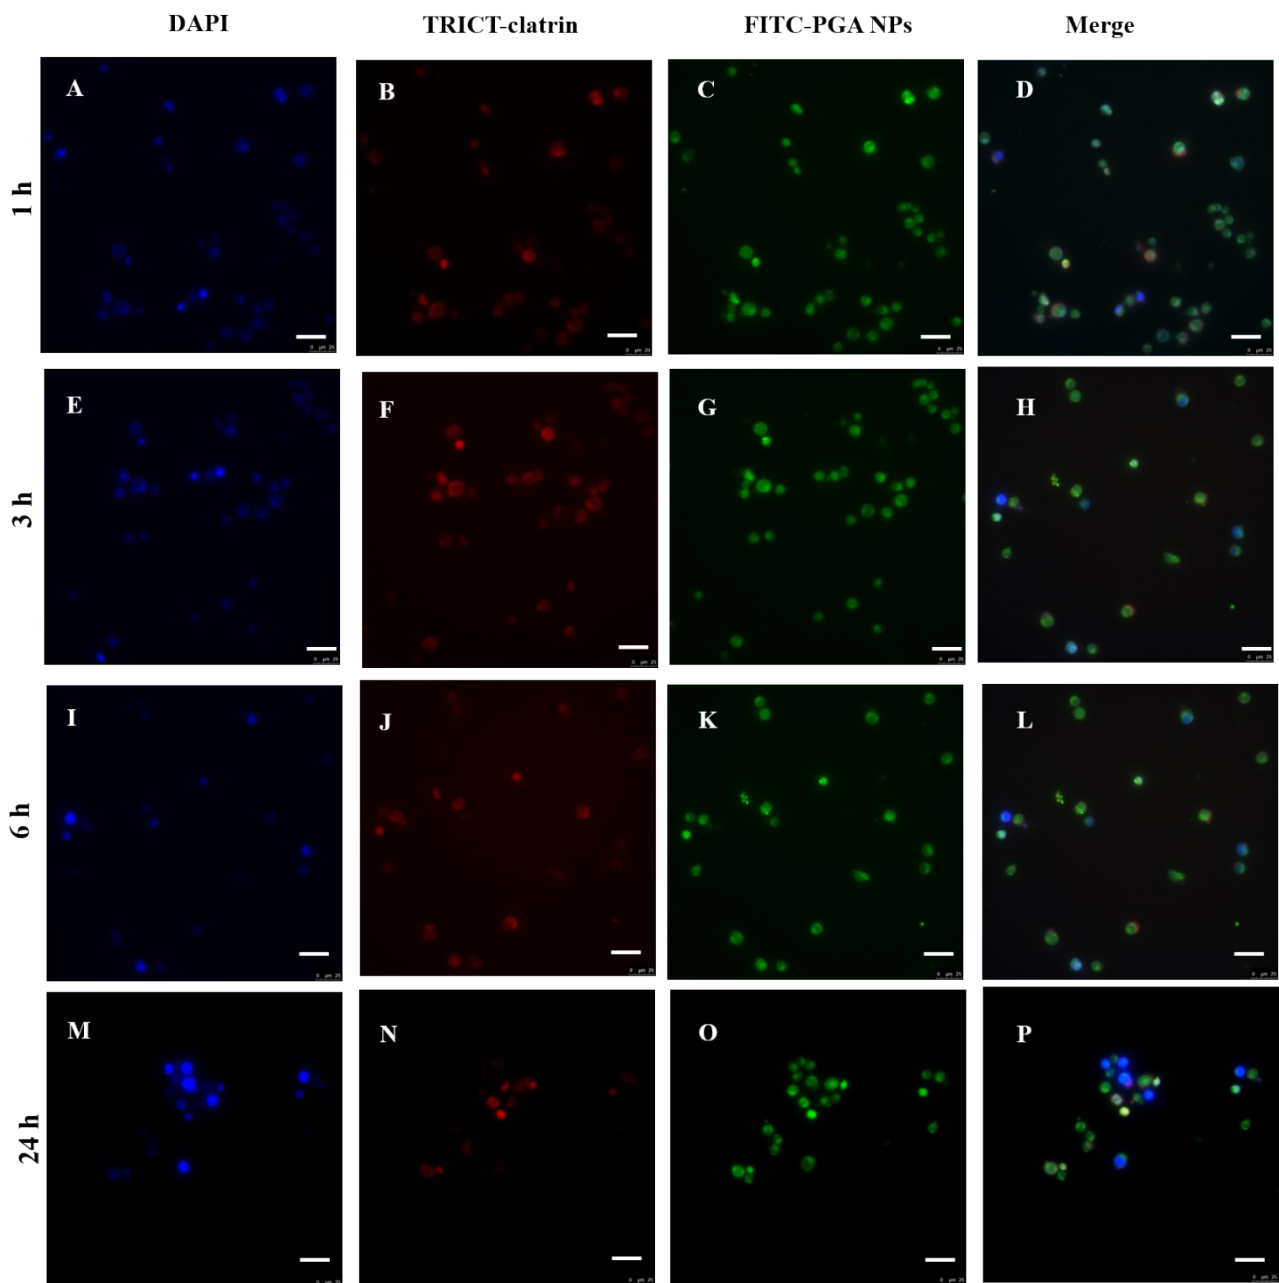

**Figure S9.** Qualitative colocalization analysis by confocal laser scanning microscopy between PGA NPs (FITC, Green) and clatrin (Red) over time for Jurkat cells. Cell nuclei were stained with DAPI (blue). Scale bars: 25  $\mu\text{m}$ . A representative result of three independent experiments is shown.



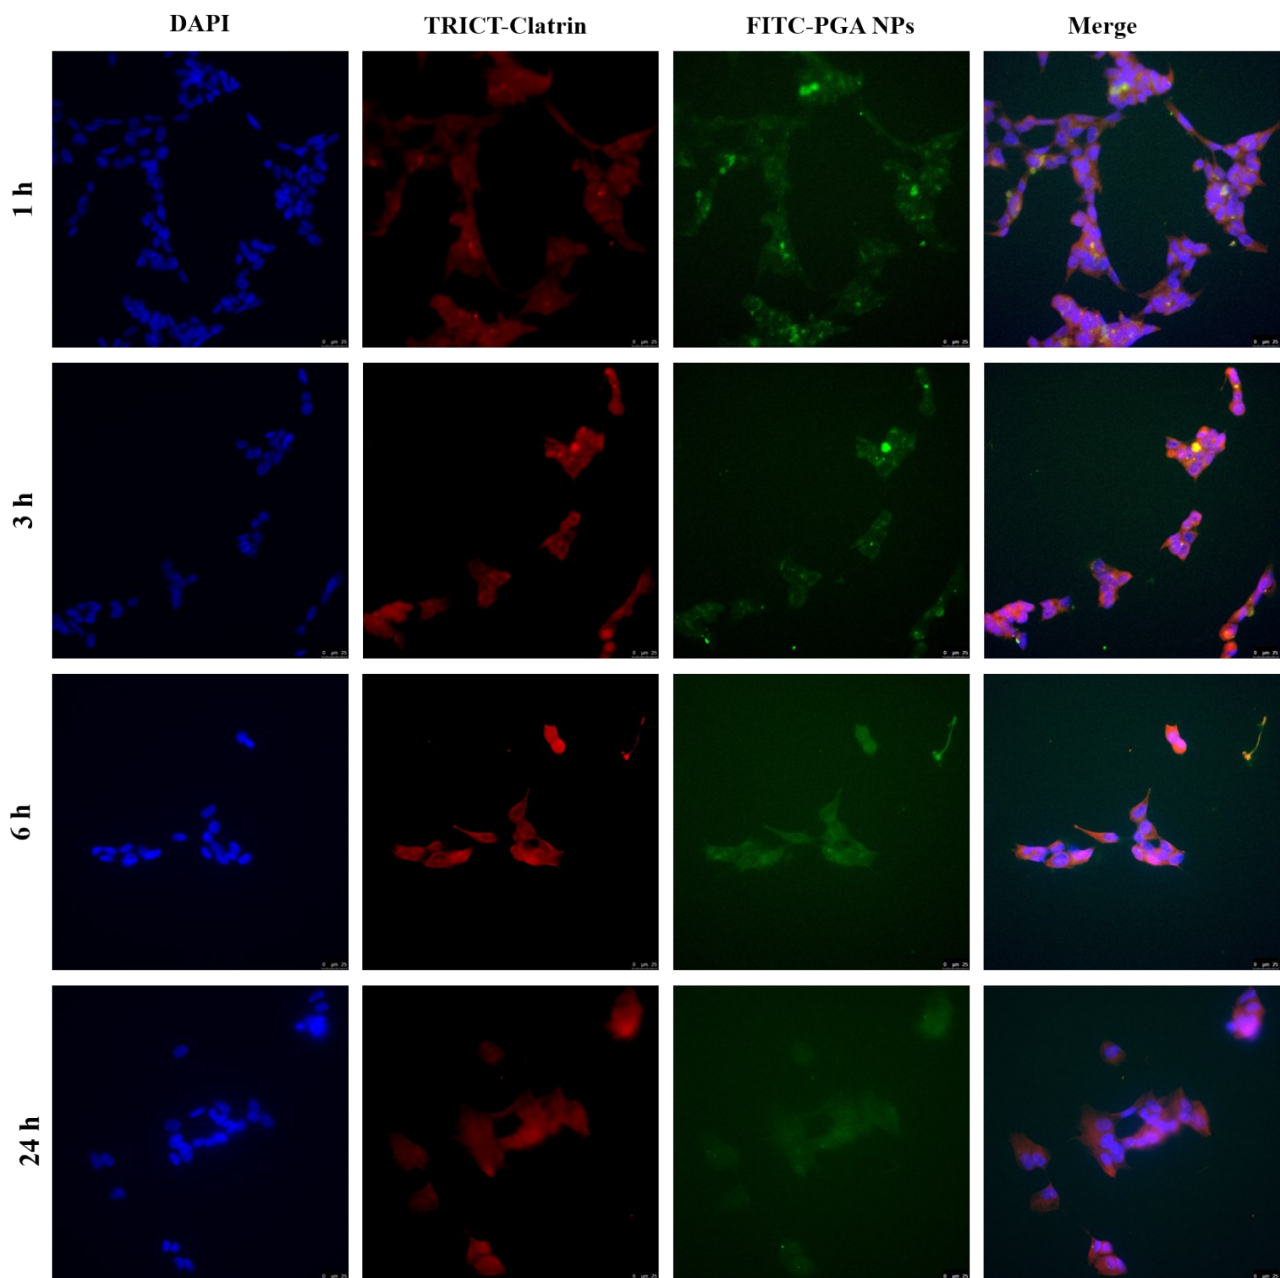

**Figure S10.** Qualitative colocalization analysis by confocal laser scanning microscopy between PGA NPs (FITC, Green) and clatrin (Red) over time for HeLa cells. Cell nuclei were stained with DAPI (blue). Scale bars: 25  $\mu\text{m}$ . A representative result of three independent experiments is shown.

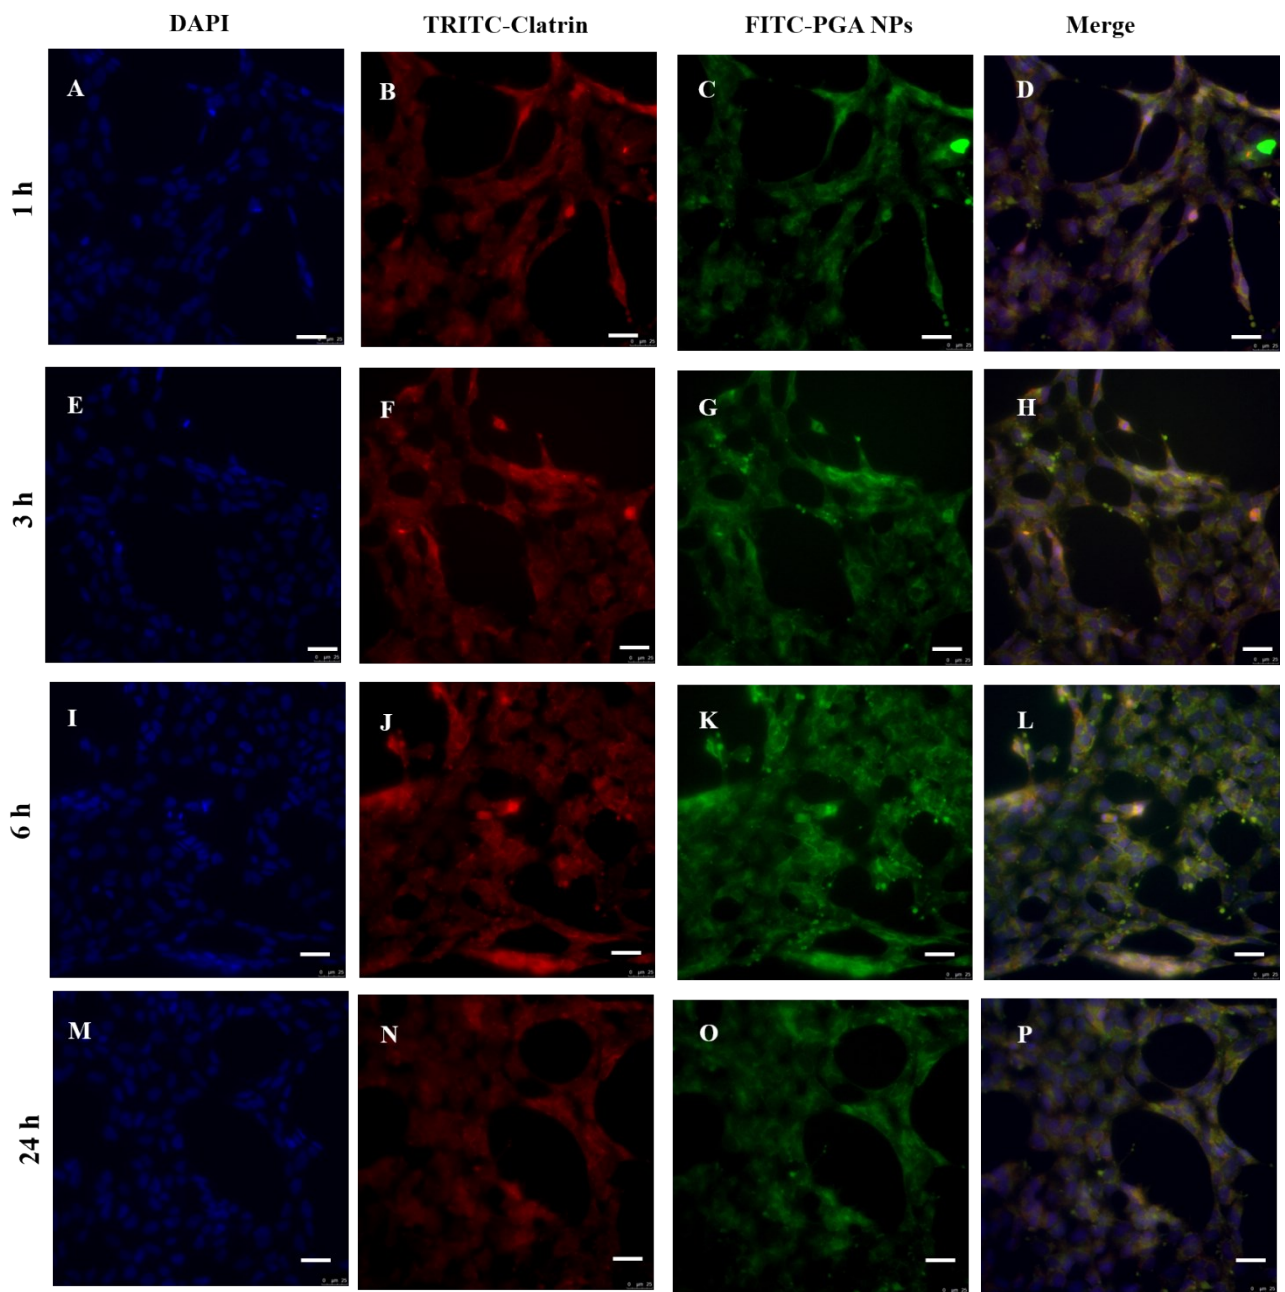

**Figure S11.** Qualitative colocalization analysis by confocal laser scanning microscopy between PGA NPs (FITC, Green) and clatrin (Red) over time for SH-SY5Y cells. Cell nuclei were stained with DAPI (blue). Scale bars: 25  $\mu\text{m}$ . A representative result of three independent experiments is shown.

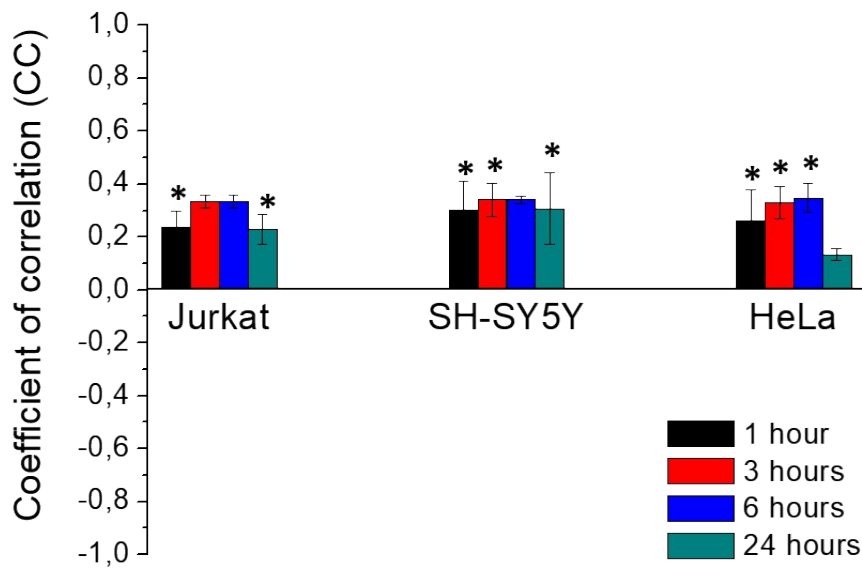

**Figure S12.** Quantitative colocalization analysis (expressed as coefficient of correlation, CC) between PGA NPs and caveolin over time for Jurkat, SH-SY5Y and HeLa cells. The coefficient of Correlation (CC) ranges from -1 to 1, where 1 means the perfect overlap, and 0 means random distribution. Ten different fields were randomly selected for each sample, and three distinct experiments were performed; \* indicates P-values of <0.05 for t-Student test.

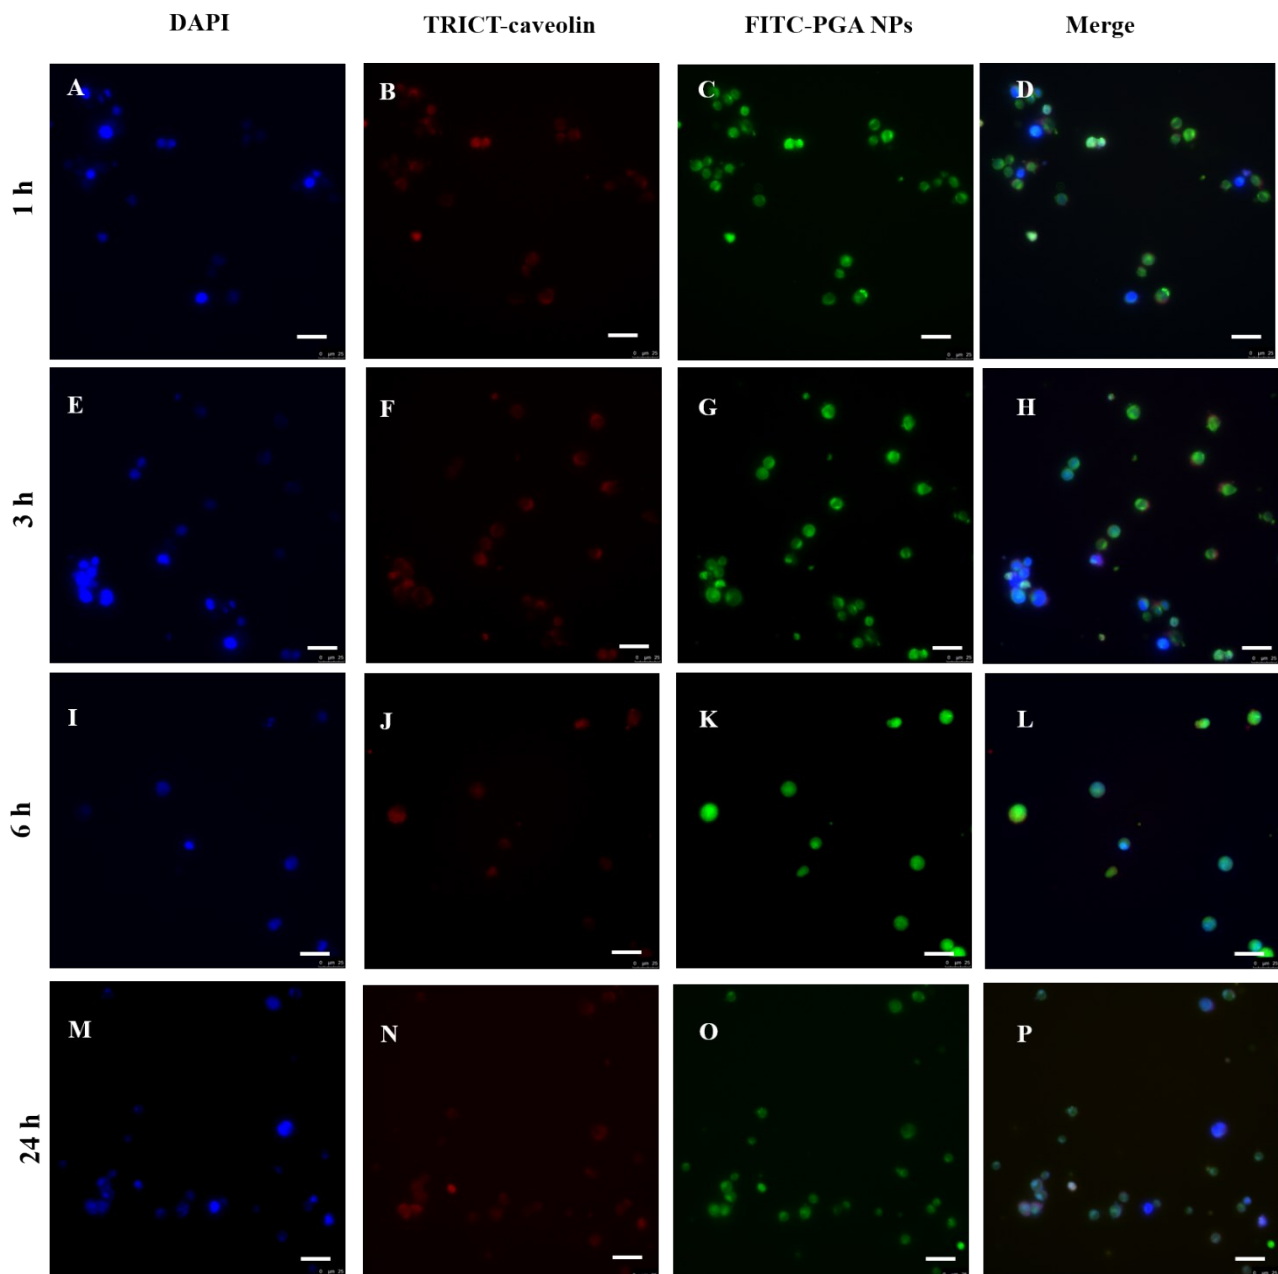

**Figure S13.** Qualitative colocalization analysis by confocal laser scanning microscopy between PGA NPs (FITC, Green) and caveolin (Red) over time for Jurkat cells. Cell nuclei were stained with DAPI (blue). Scale bars: 25  $\mu\text{m}$ . A representative result of three independent experiments is shown.

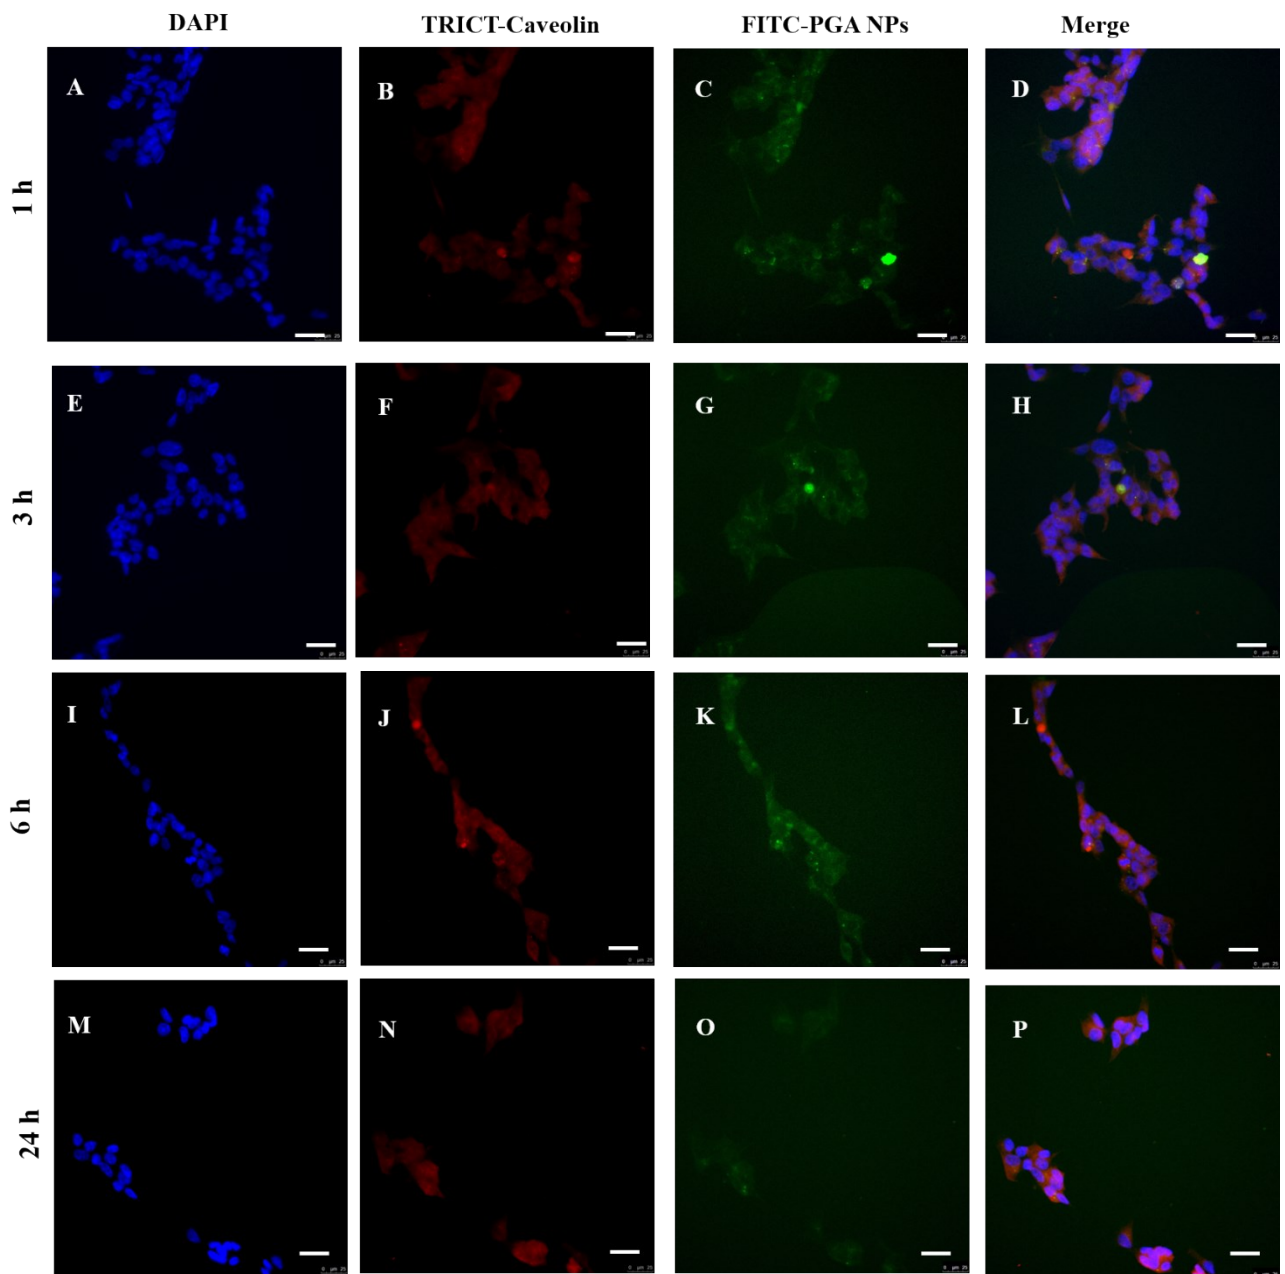

**Figure S14.** Qualitative colocalization analysis by confocal laser scanning microscopy between PGA NPs (FITC, Green) and caveolin (Red) over time for HeLa cells. Cell nuclei were stained with DAPI (blue). Scale bars: 25  $\mu\text{m}$ . A representative result of three independent experiments is shown.

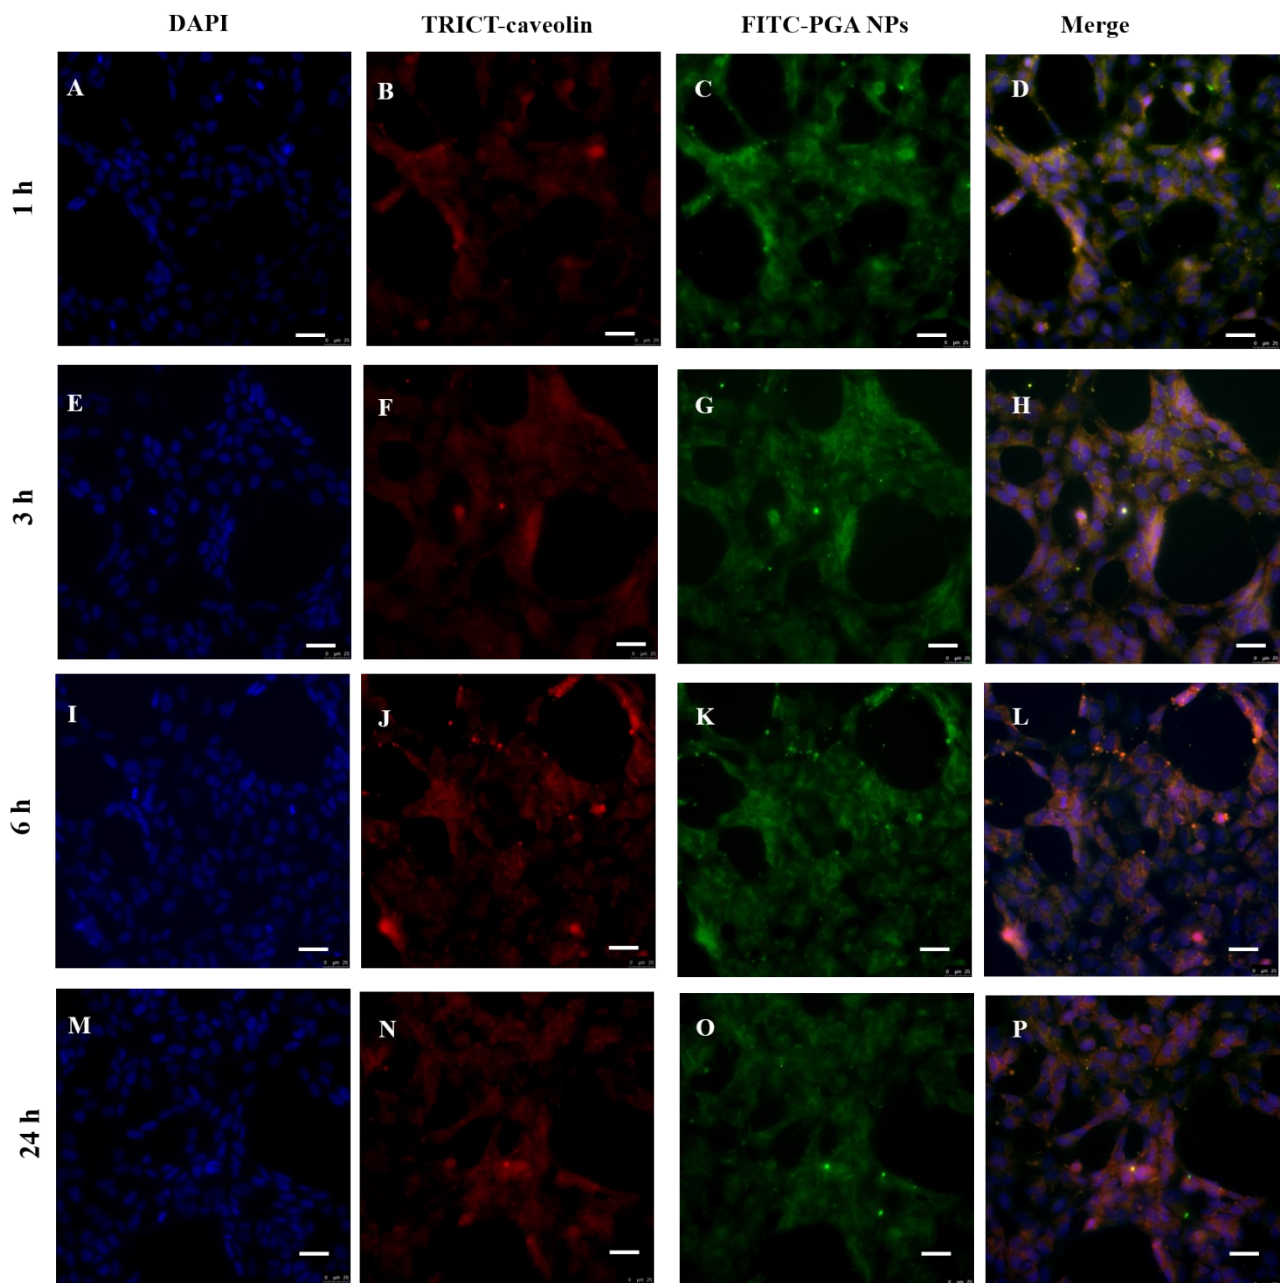

**Figure S15.** Qualitative colocalization analysis by confocal laser scanning microscopy between PGA NPs (FITC, Green) and caveolin (Red) over time for SH-SY5Y cells. Cell nuclei were stained with DAPI (blue). Scale bars: 25  $\mu$ m. A representative result of three independent experiments is shown.

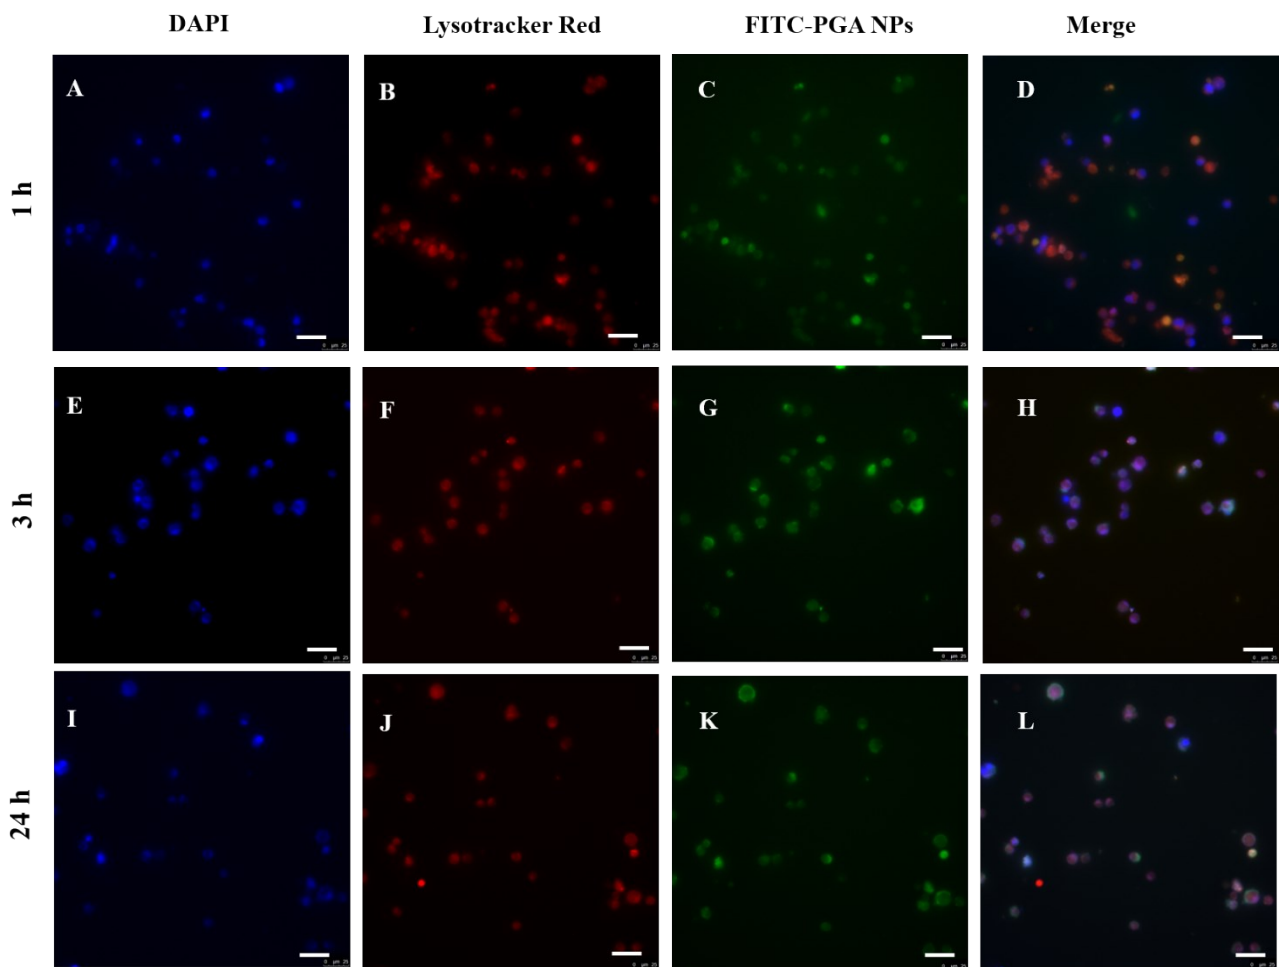

**Figure S16.** Qualitative colocalization analysis by confocal laser scanning microscopy between PGA NPs (FITC, Green) and Lysotracker (Red) over time for Jurkat cells. Cell nuclei were stained with DAPI (blue). Scale bars: 25  $\mu\text{m}$ . A representative result of three independent experiments is shown.

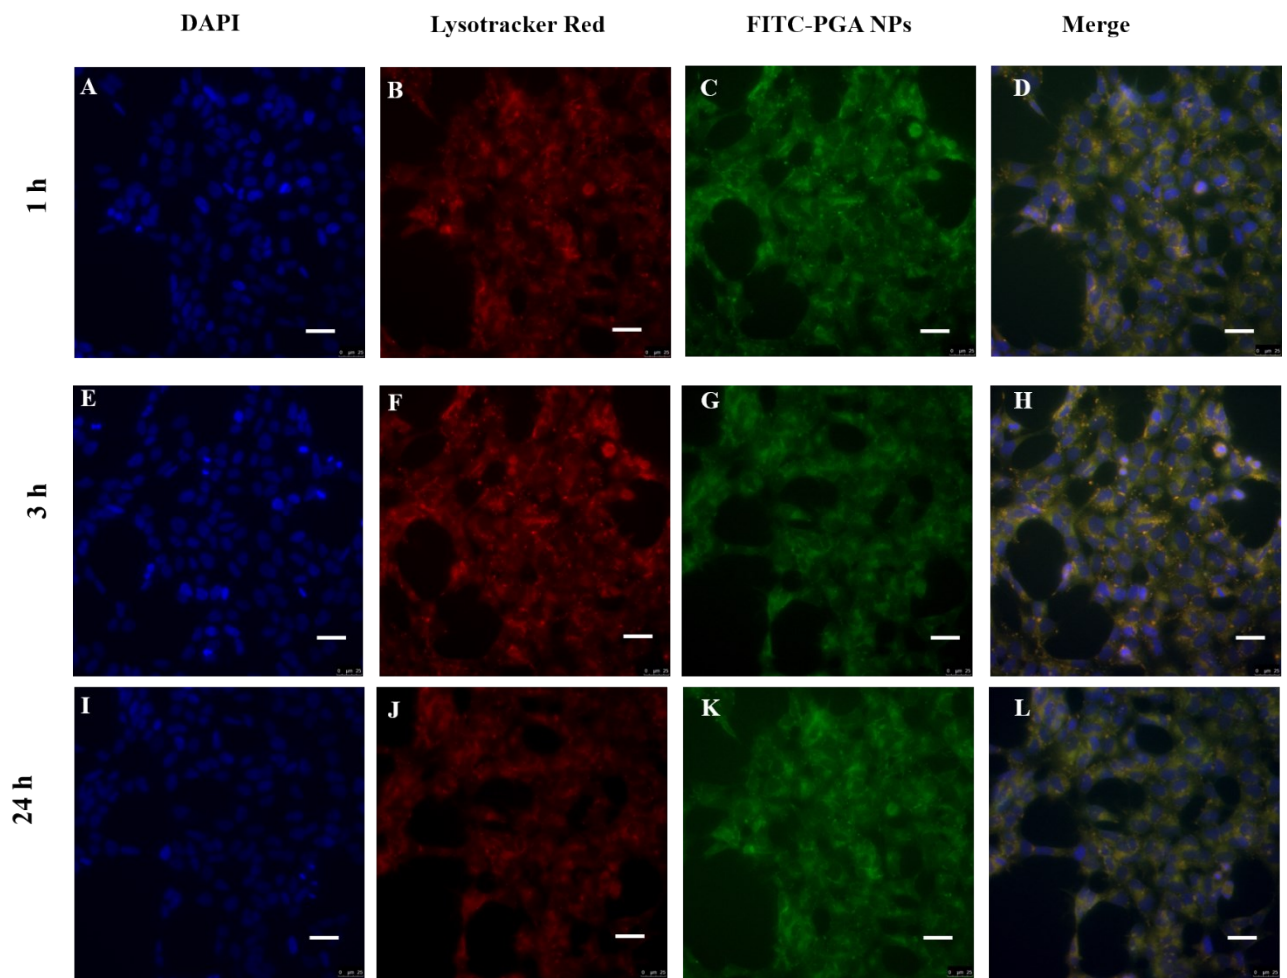

**Figure S17.** Qualitative colocalization analysis by confocal laser scanning microscopy between PGA NPs (FITC, Green) and Lysotracker (Red) over time for HeLa cells. Cell nuclei were stained with DAPI (blue). Scale bars: 25  $\mu$ m. A representative result of three independent experiments is shown.



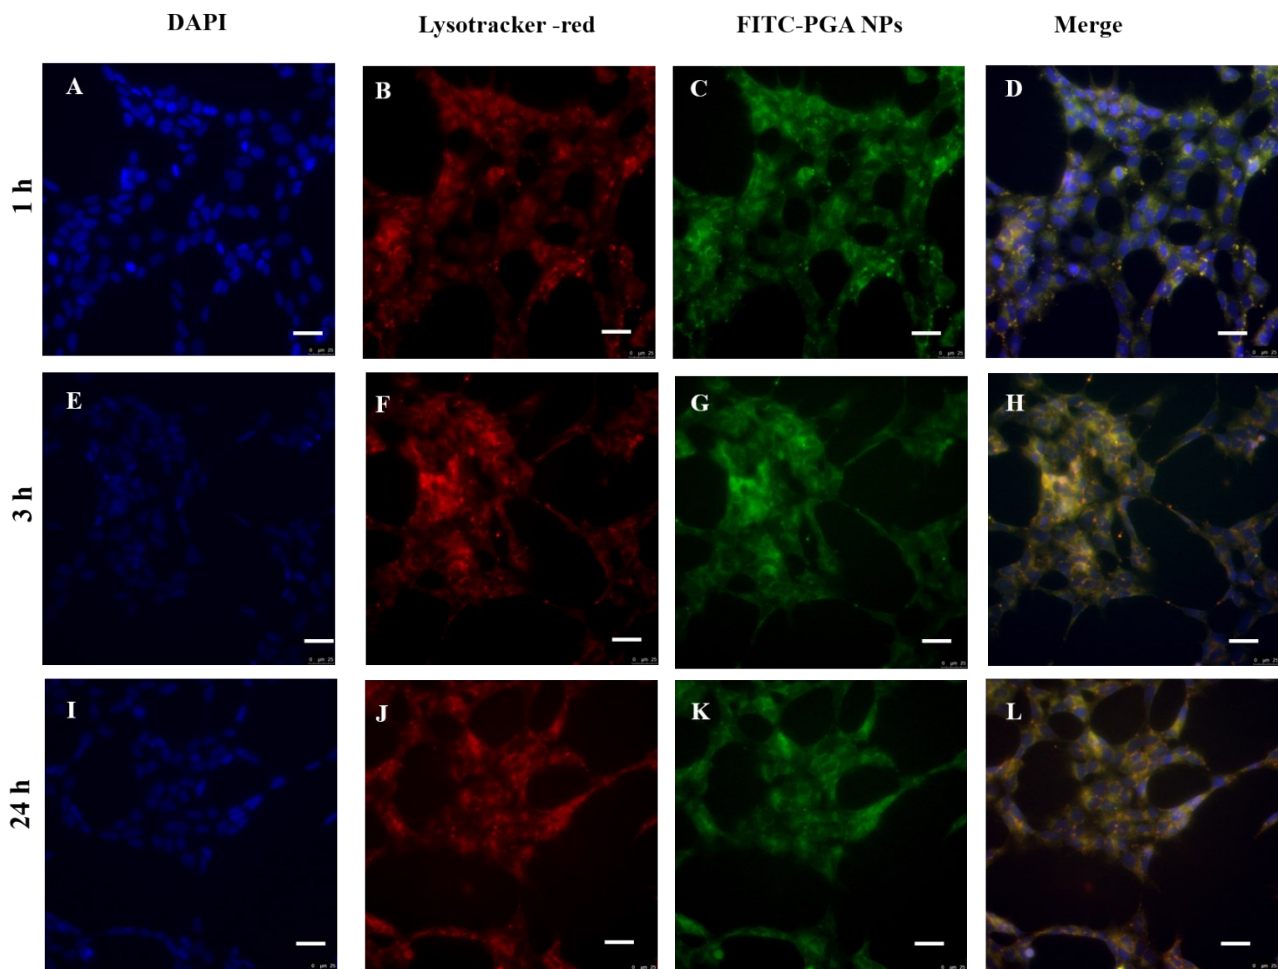

**Figure S18.** Qualitative colocalization analysis by confocal laser scanning microscopy between PGA NPs (FITC, Green) and Lysotracker (Red) over time for SH-SY5Y cells. Cell nuclei were stained with DAPI (blue). Scale bars: 25  $\mu\text{m}$ . A representative result of three independent experiments is shown.

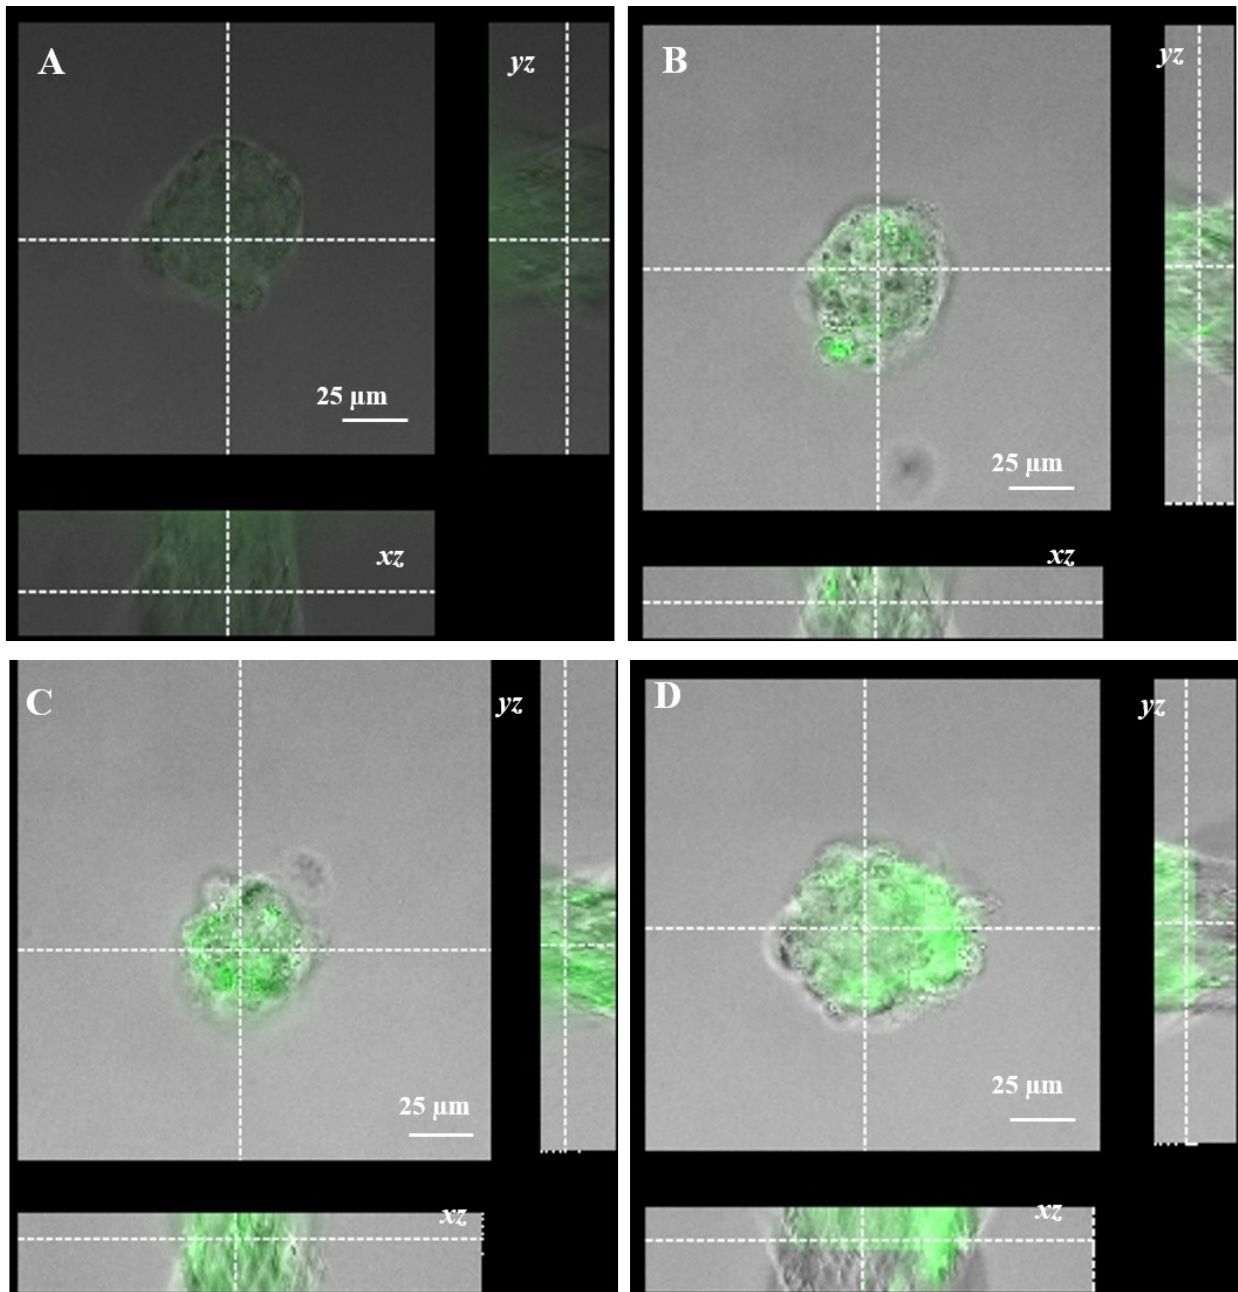

**Figure S19.** Qualitative transfection efficacy analyzed after 5 days in 3D human neuroblastoma (SH-SY5Y) spheroids treated with DNA-Lipofectamine 3000 (A), PEI-DNA loaded PGA NPs (B), PRM-DNA loaded PGA NPs (C) and CH-DNA loaded PGA NPs (D). z-stack optical sections (yz and xz), obtained through photoluminescence reconstruction in the z-direction with a z-resolution of 200 nm, confirm the spatial distribution of EGFP inside spheroids. Scale bars: 25  $\mu\text{m}$ . DNA refer to pT7-EGFP plasmid. A representative result of three independent experiments is shown.

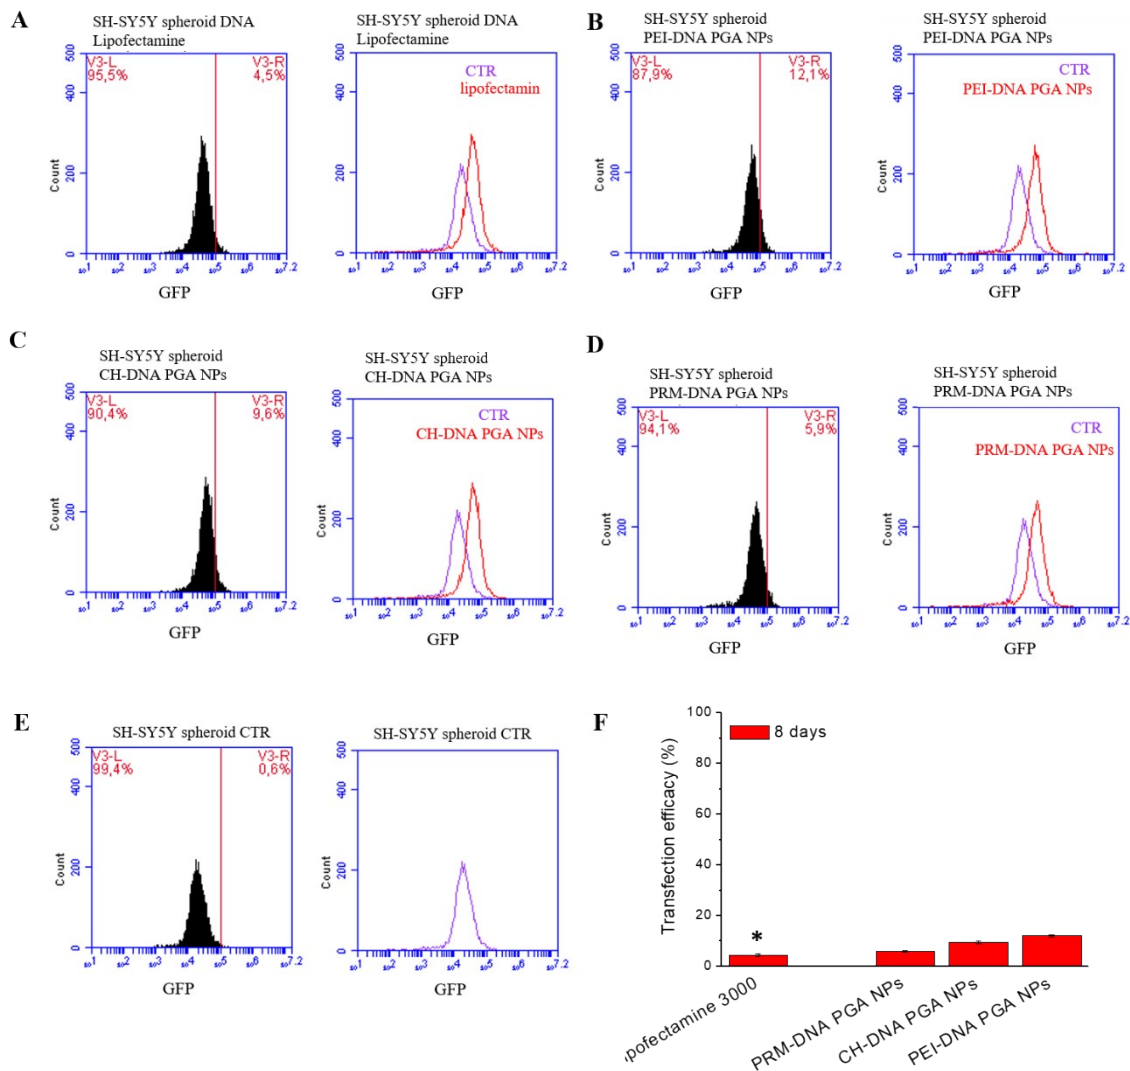

**Figure S20.** Transfection analysis determined by the EGFP content as assessed by cytofluorimetric analysis after 8 days in 3D human neuroblastoma (SH-SY5Y) spheroids treated with DNA-Lipofectamine 3000 (A), PEI-DNA loaded PGA NPs (B), CH-DNA loaded PGA NPs (C), PRM-DNA loaded PGA NPs (D), untreated spheroid as control (CTR, E). Quantitative transfection efficacy (%) determined by the EGFP content as assessed by cytofluorimetric analysis (F). DNA refer to pT7-EGFP plasmid. A representative result of three independent experiments is shown; \* indicates P-values of <0.05 for t-Student test.
